# Supplementary material for: One-to-one laccase–gold nanoparticle conjugates: molecular recognition and activity enhancement
Source: Royal Society of Chemistry journal article supplement (doi:10.1039/c3ra43192d), 2013-01-01
Supplement: c3ra43192d.pdf [file c3ra43192d.pdf]

Supplementary Data

**ONE-TO-ONE LACCASE-GOLD NANOPARTICLE CONJUGATES:  
MOLECULAR RECOGNITION AND ACTIVITY ENHANCEMENT**

**Darío G. Abradelo<sup>a</sup>, Roberto Cao<sup>\*a</sup>, Sabine Schlecht<sup>\*b</sup>**

<sup>a</sup>Laboratorio de Bioinorgánica, Facultad de Química, Universidad de La Habana, Cuba.

<sup>b</sup>Institut für Anorganische und Analytische Chemie, Justus-Liebig Universität, Giessen, Germany.

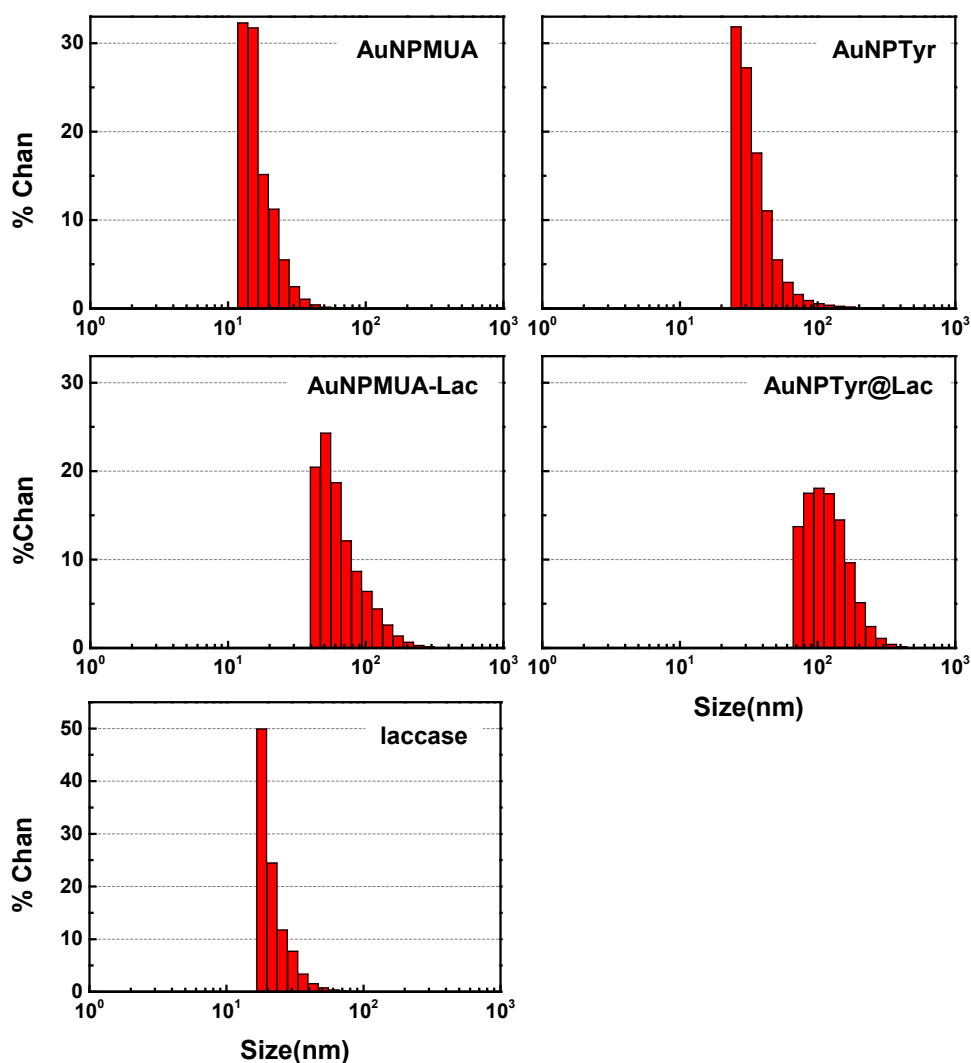

Figure S1. DLS profiles of the different colloids: AuNPMUA (15 ( $\pm$ 3) nm); AuNPTyr (18 ( $\pm$ 3) nm); AuNPMUA-Lac(60 ( $\pm$ 18) nm); AuNPTyr@Lac (110 ( $\pm$ 40) nm); laccase (20 ( $\pm$ 4) nm).

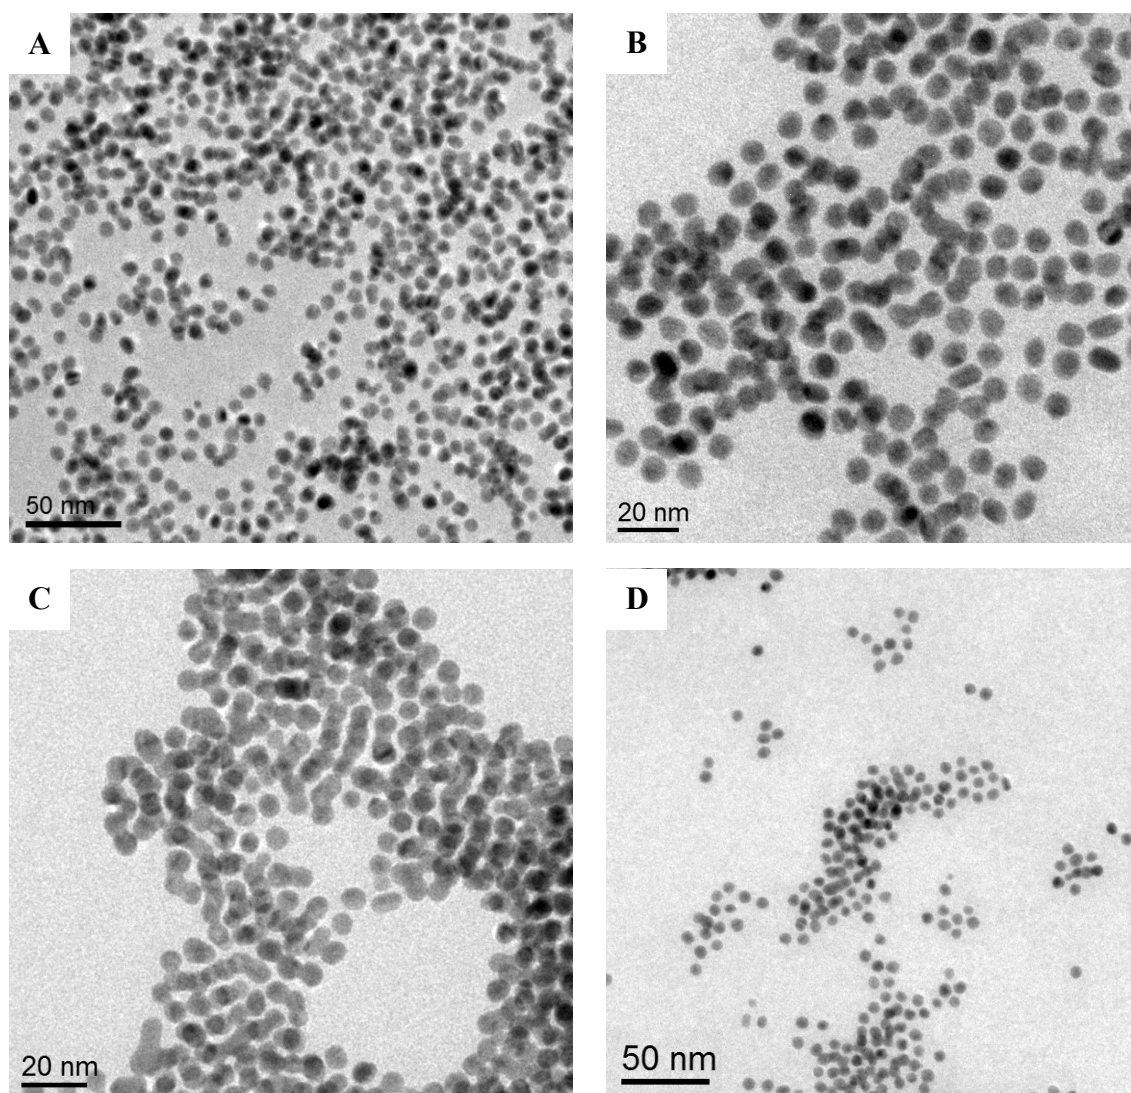

Figure S2. TEM images of the nanoparticles. A) AuNPMUA. B) AuNPTyr. C) AuNPMUA-Lac. D) AuNPTyr@Lac.

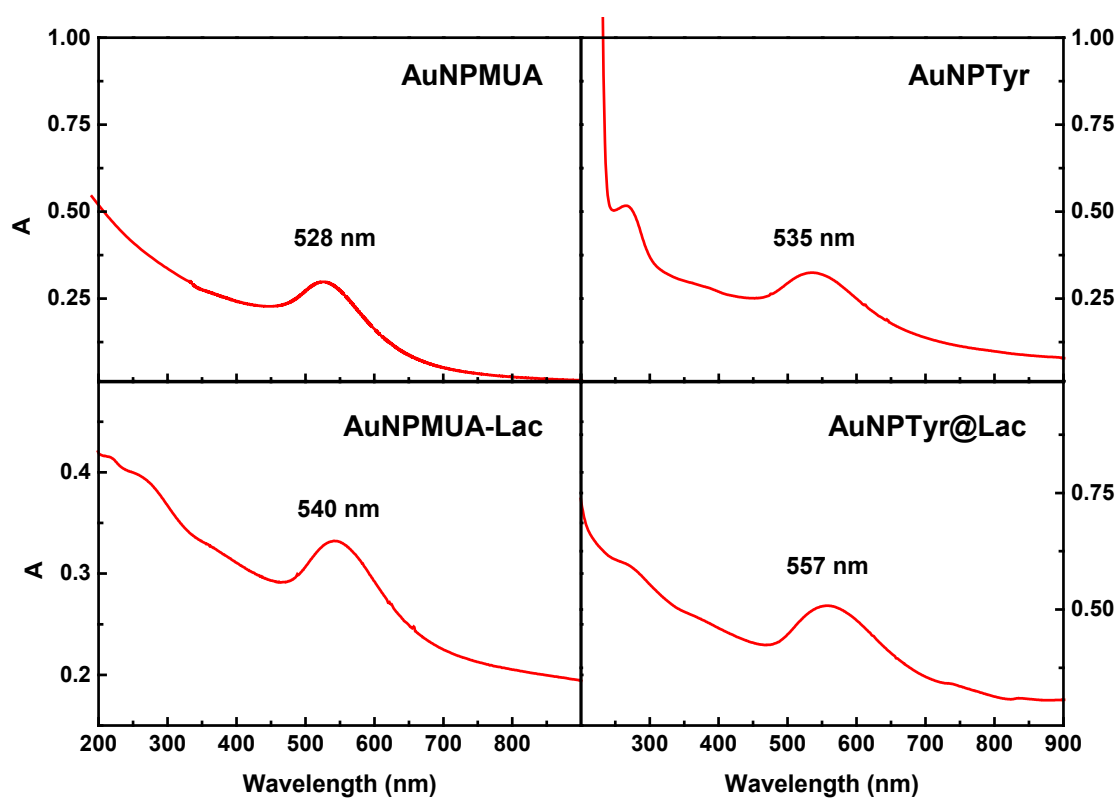

Figure S3. UV-vis spectra of the corresponding nanoparticles.

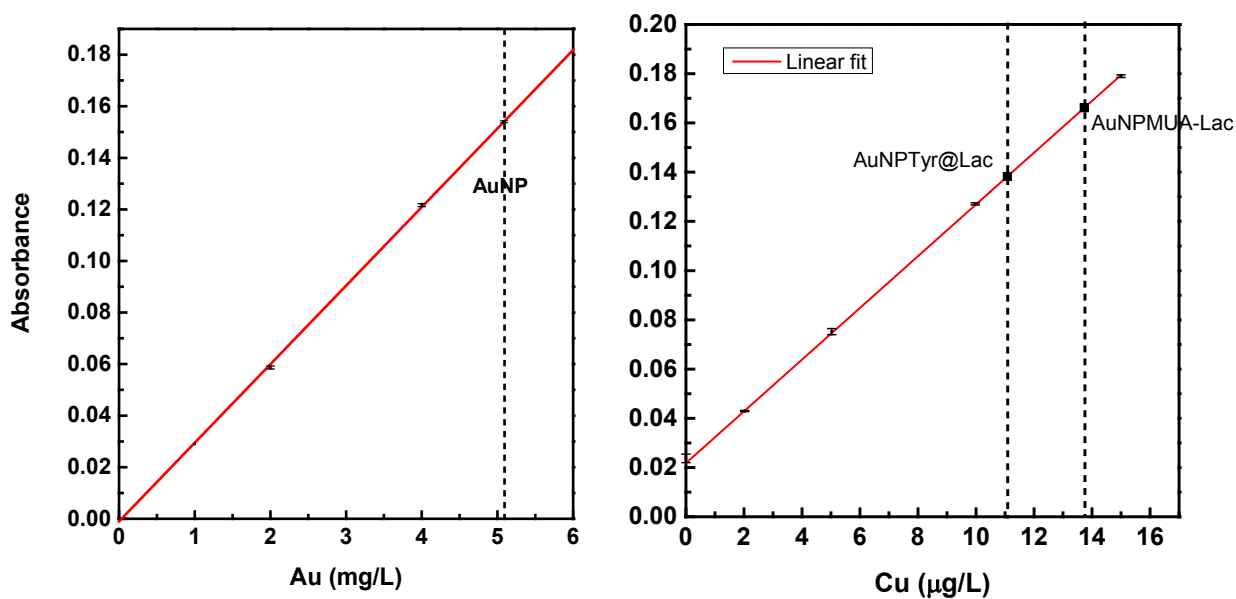

Figure S4. Atomic absorption spectroscopy (AAS) calibration curves. Determination of Au and Cu in 0.01 mg/mL and 0.5 mg/mL dispersions of the colloids, respectively. The sample concentrations were obtained by automatic dilutions of the initial 1 mg/mL solution with the automated sampling system attached to the AAS instrument. All runs were repeated three times.
